# Supplementary material
Source: publisher figshare collection journal article supplement (https://acs.figshare.com/ndownloader/files/27242647)
Supplement: Supplementary file 1 [file 27242647]

# SUPPORTING INFORMATION

## **17-Hydroxybrevianamide N and Its N1-Methyl Derivative, Quinazolinones from a Soft Coral-Derived *Aspergillus* sp. Fungus: 13S Enantiomers as the True Natural Products**

Wei-Feng Xu,<sup>†,1</sup> Rong Chao,<sup>†,1</sup> Yang Hai,<sup>†</sup> Yang-Yang Guo,<sup>†</sup> Mei-Yan Wei,<sup>†,‡</sup>  
Chang-Yun Wang,<sup>†,⊥</sup> Chang-Lun Shao<sup>\*,†,⊥</sup>

<sup>†</sup> Key Laboratory of Marine Drugs, The Ministry of Education of China, School of Medicine and Pharmacy, Ocean University of China, Qingdao 266003, People's Republic of China

<sup>‡</sup> College of Food Science and Engineering, Ocean University of China, Qingdao 266003, People's Republic of China

<sup>⊥</sup> Laboratory for Marine Drugs and Bioproducts, Qingdao National Laboratory for Marine Science and Technology, Qingdao 266200, People's Republic of China

### **Corresponding Author**

\*E-mail: shaochenglun@163.com.

### **Author Contributions**

<sup>1</sup> These authors contributed equally to this work.

## List of Supporting Information

**Figure S1.** The transformation of (–)-**1** and (+)-**1** in MeOH with different pH levels

**Figure S2.** The **1** production trendline of addition of Phe, Ant, MSG or Gly to the rice solid fermentation.

**Figure S3.** The **2** production curve of addition of Phe, Ant, MSG or Gly to the rice solid fermentation

**Figure S4.**  $^1\text{H}$  NMR spectrum of compound **1** in  $\text{DMSO-}d_6$

**Figure S5.**  $^{13}\text{C}$  NMR spectrum of compound **1** in  $\text{DMSO-}d_6$

**Figure S6.** HSQC spectrum of compound **1** in  $\text{DMSO-}d_6$

**Figure S7.** COSY spectrum of compound **1** in  $\text{DMSO-}d_6$

**Figure S8.** HMBC spectrum of compound **1** in  $\text{DMSO-}d_6$

**Figure S9.** HRESIMS ( $\text{ESI}^-$ ) of compound **1**

**Figure S10.**  $^1\text{H}$  NMR spectrum of compound **2** in  $\text{DMSO-}d_6$

**Figure S11.**  $^{13}\text{C}$  NMR spectrum of compound **2** in  $\text{DMSO-}d_6$

**Figure S12.** HSQC spectrum of compound **2** in  $\text{DMSO-}d_6$

**Figure S13.** COSY spectrum of compound **2** in  $\text{DMSO-}d_6$

**Figure S14.** HMBC spectrum of compound **2** in  $\text{DMSO-}d_6$

**Figure S15.** HRESIMS ( $\text{ESI}^+$ ) of compound **2**

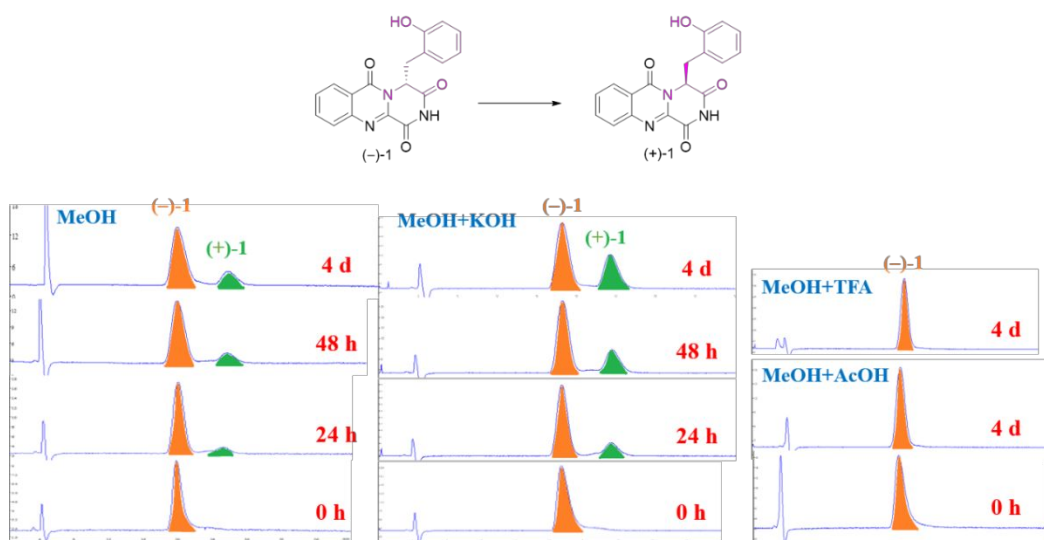

**Figure S1.** The transformation of (-)-1 and (+)-1 in MeOH with different pH levels.

To study the effects of addition of phenylalanine (Phe), anthranilate (Ant), monosodium glutamate (MSG) or glycine (Gly) on aspergilimides production, DL-Phe, Ant, MSG, or Gly (each 100 mg/L in seawater) were added to the rice solid fermentation respectively. Nevertheless, addition of the amino acids showed almost no influence on the production by comparison with the rice solid fermentation (pink curve). Under these culture conditions, a maximum production of **1** and **2** was obtained after 19 days of cultivation (Figures S2 and S3).

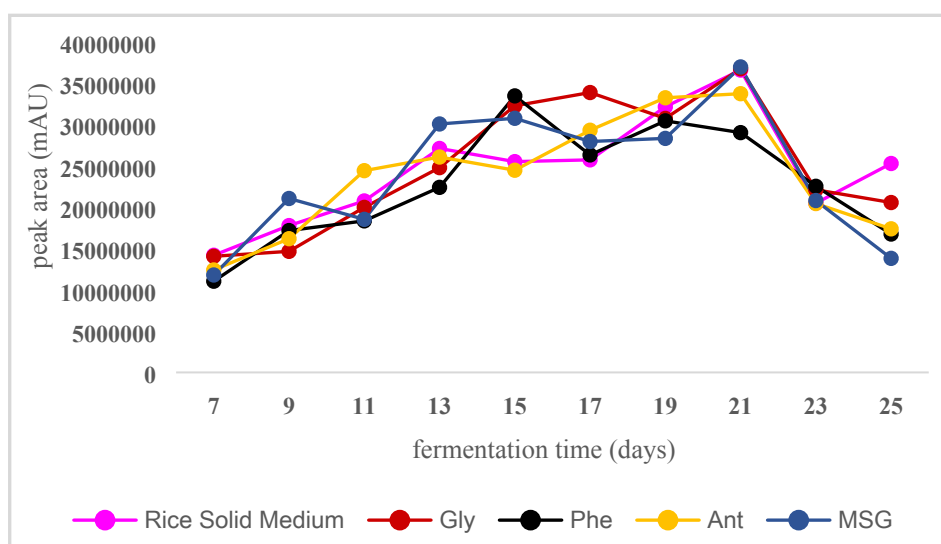

**Figure S2.** The **1** production trendline of addition of Phe, Ant, MSG or Gly to the rice solid fermentation.

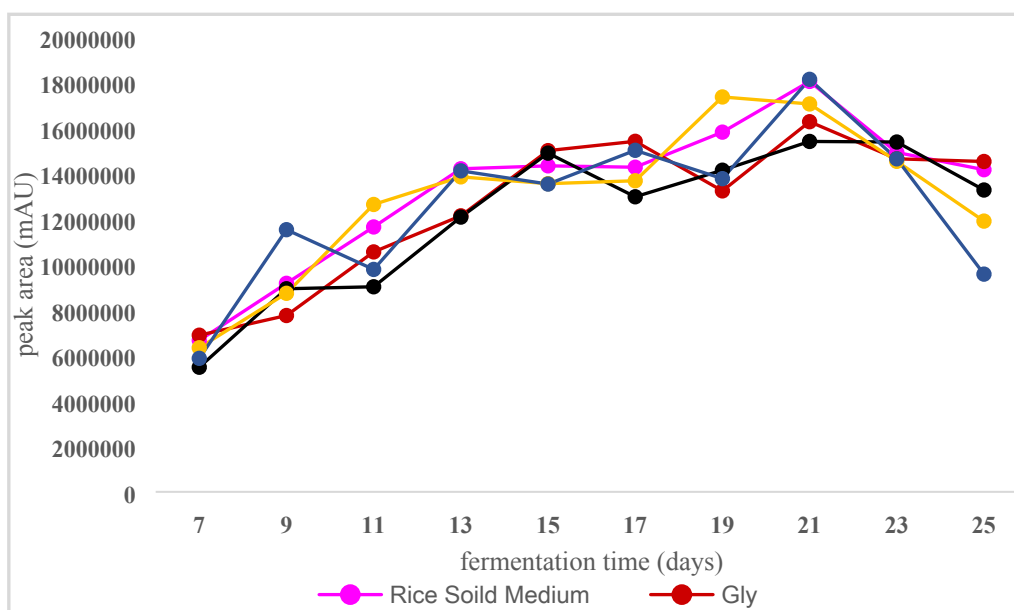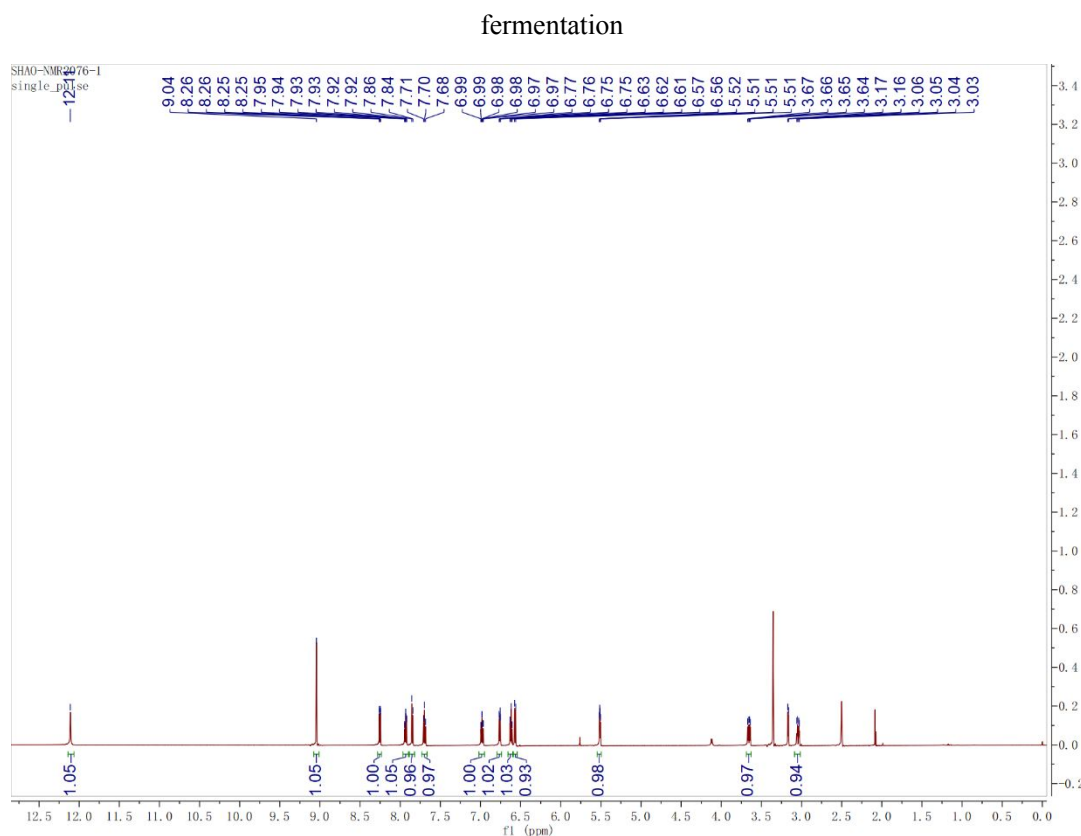

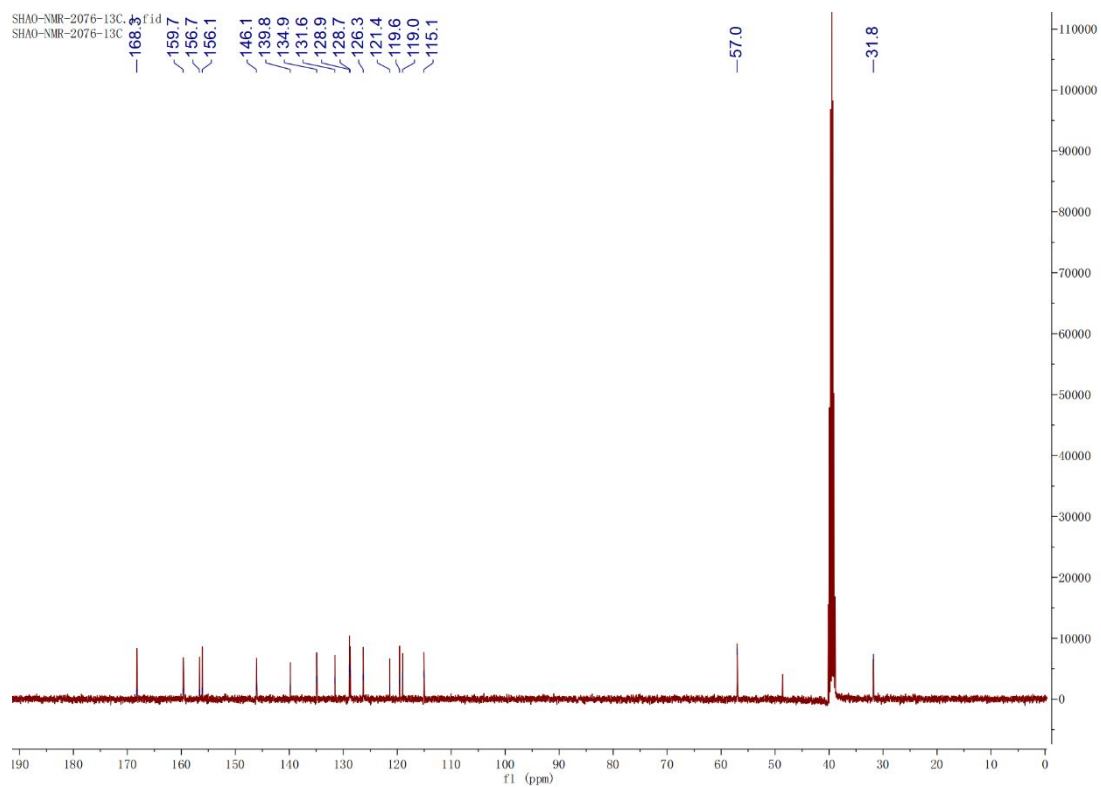

**Figure S5.**  $^{13}\text{C}$  NMR spectrum of compound **1** in  $\text{DMSO-}d_6$

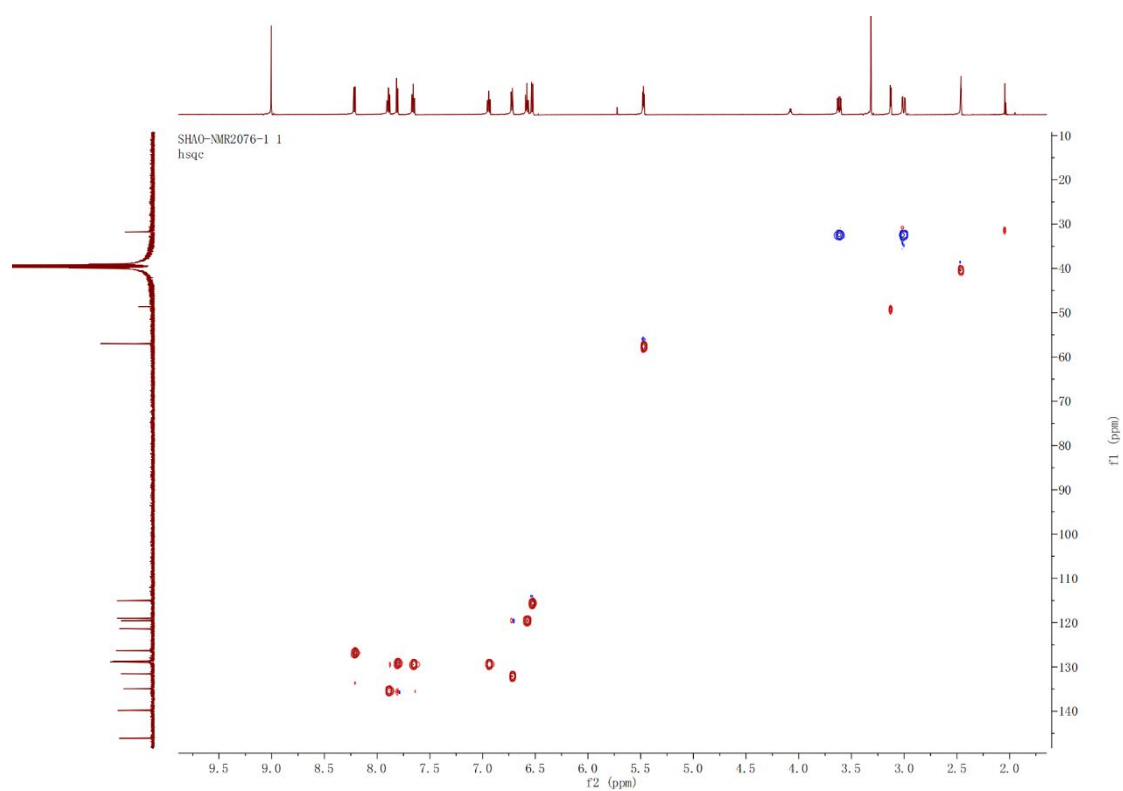

**Figure S6.** HSQC spectrum of compound **1** in DMSO- $d_6$

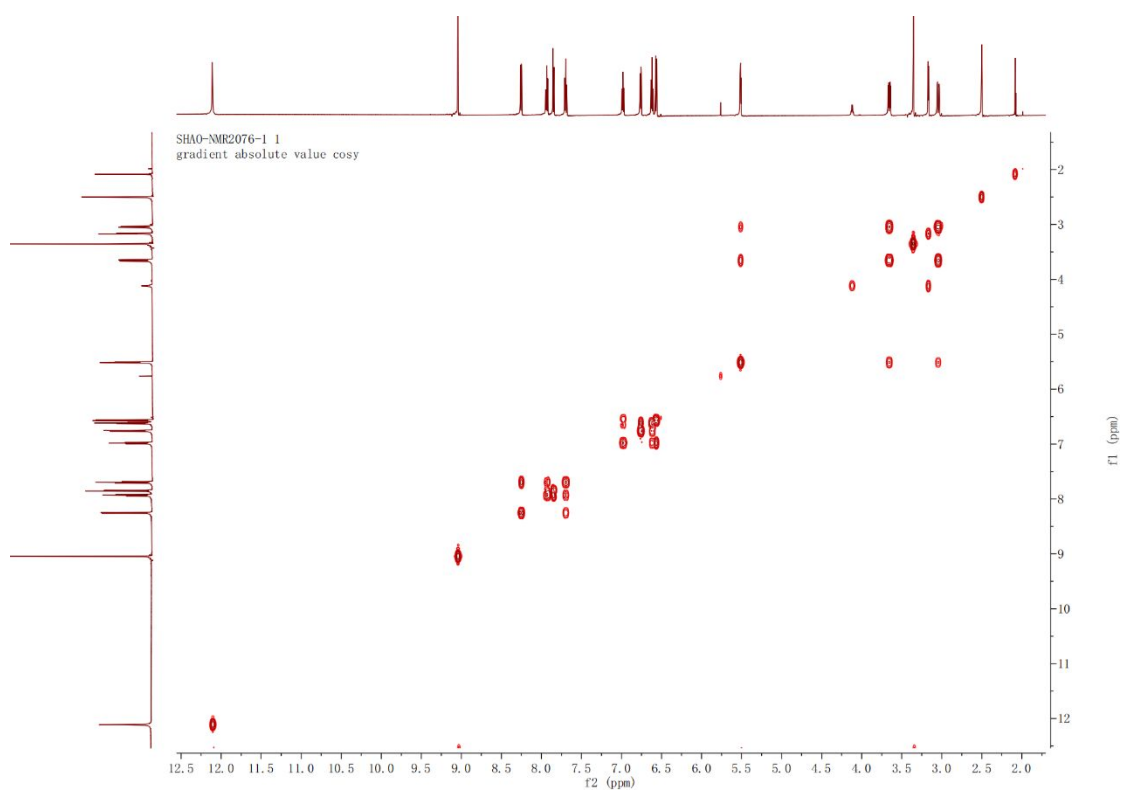

**Figure S7.** COSY spectrum of compound **1** in DMSO- $d_6$

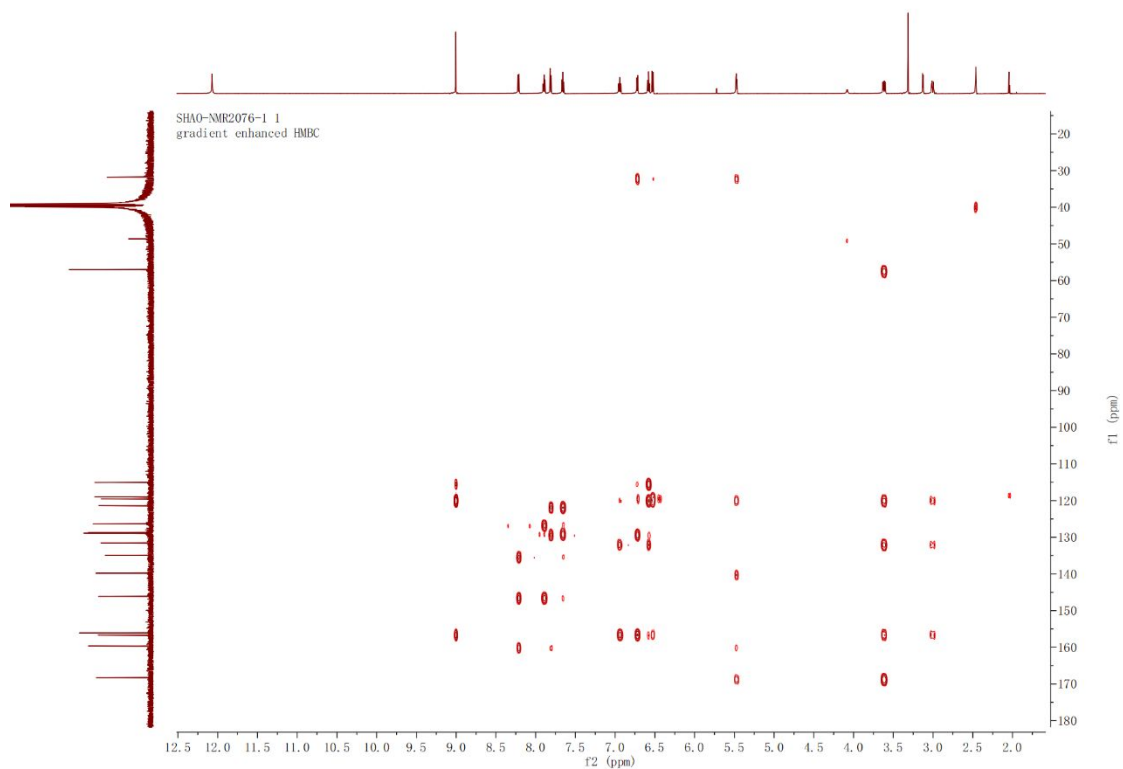

**Figure S8.** HMBC spectrum of compound **1** in DMSO- $d_6$

CHNQD-2076 #14 RT: 0.17 AV: 1 NL: 6.04E8  
T: FTMS - p ESI Full ms [100.0000-1500.0000]

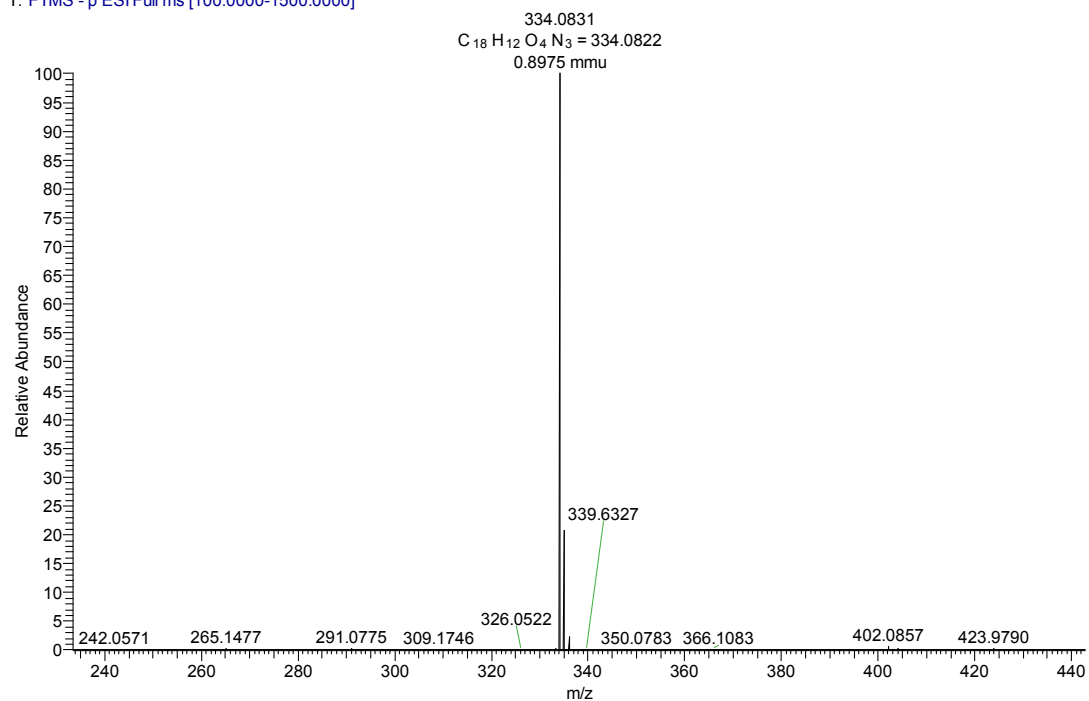

**Figure S9.** HRESIMS (ESI<sup>-</sup>) of compound **1**

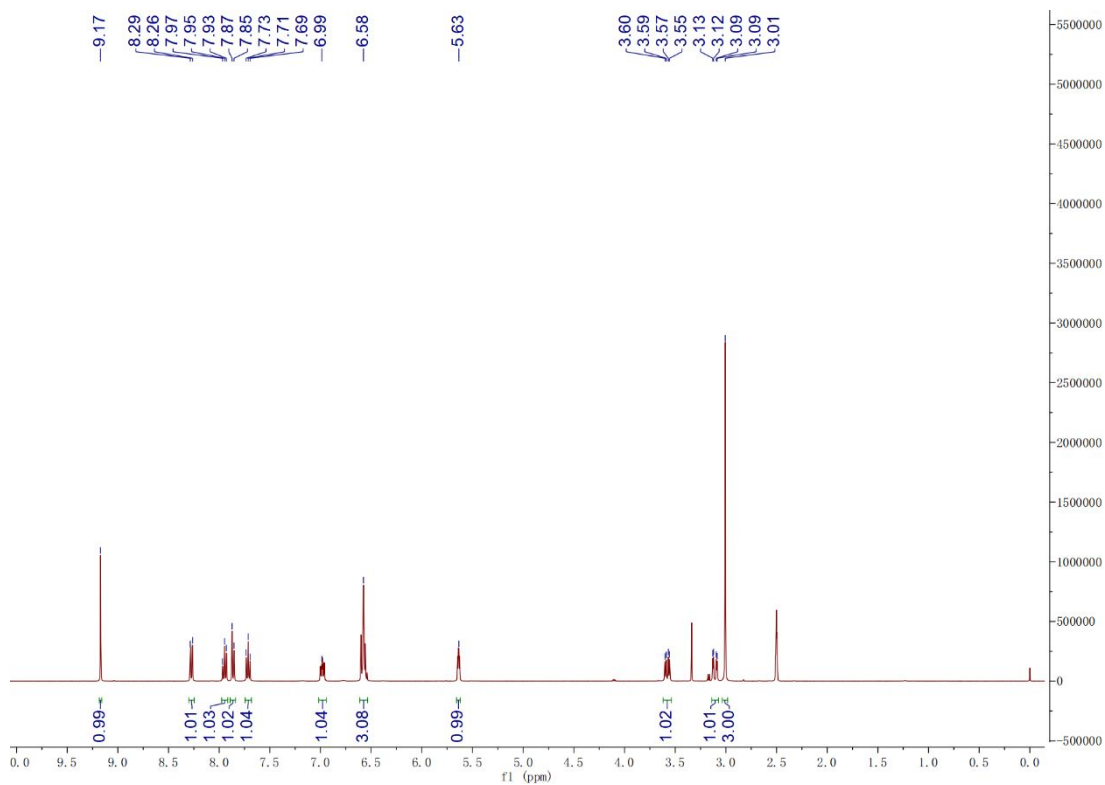

**Figure S10.**  $^1\text{H}$  NMR spectrum of compound **2** in  $\text{DMSO-}d_6$

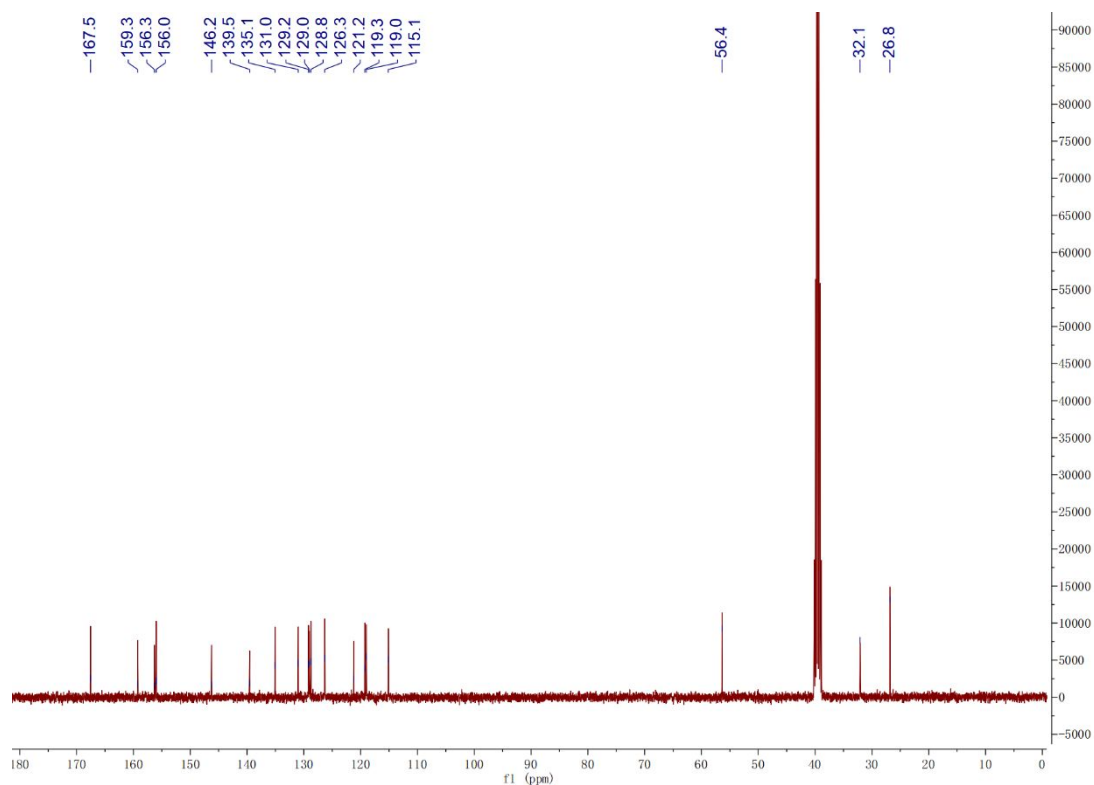

**Figure S11.**  $^{13}\text{C}$  NMR spectrum of compound **2** in  $\text{DMSO-}d_6$

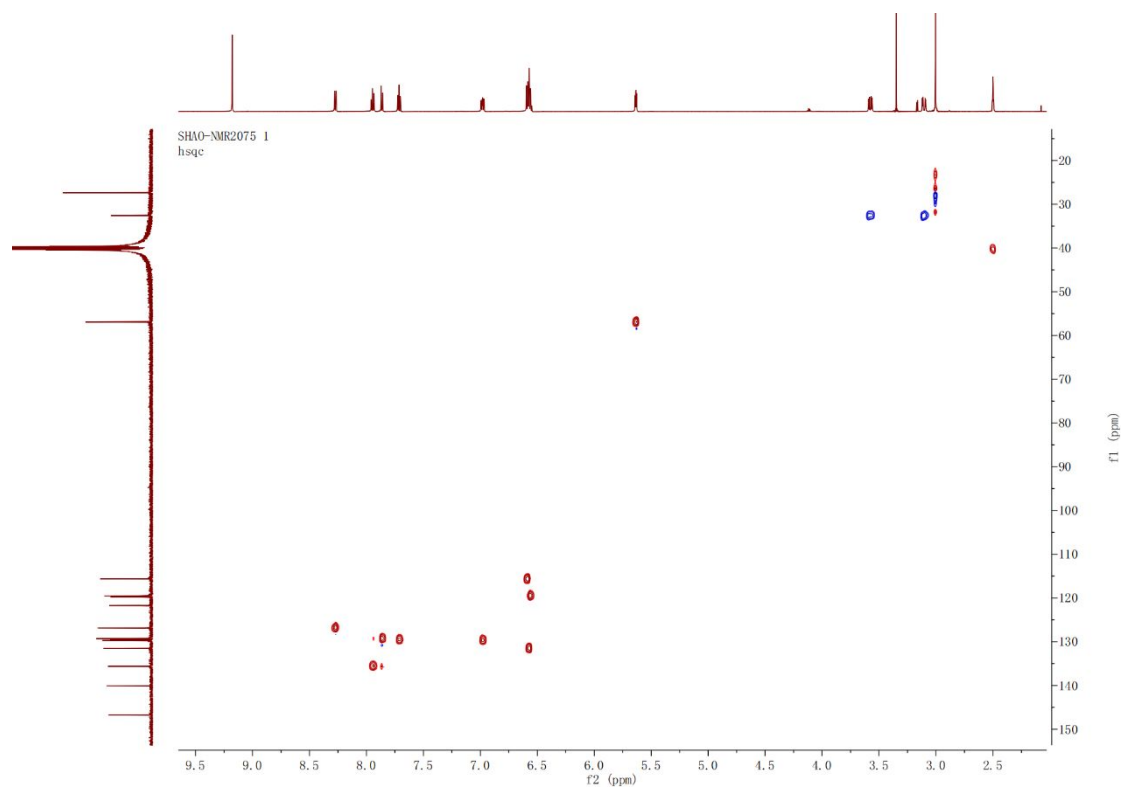



**Figure S12.** HSQC spectrum of compound **2** in DMSO- $d_6$

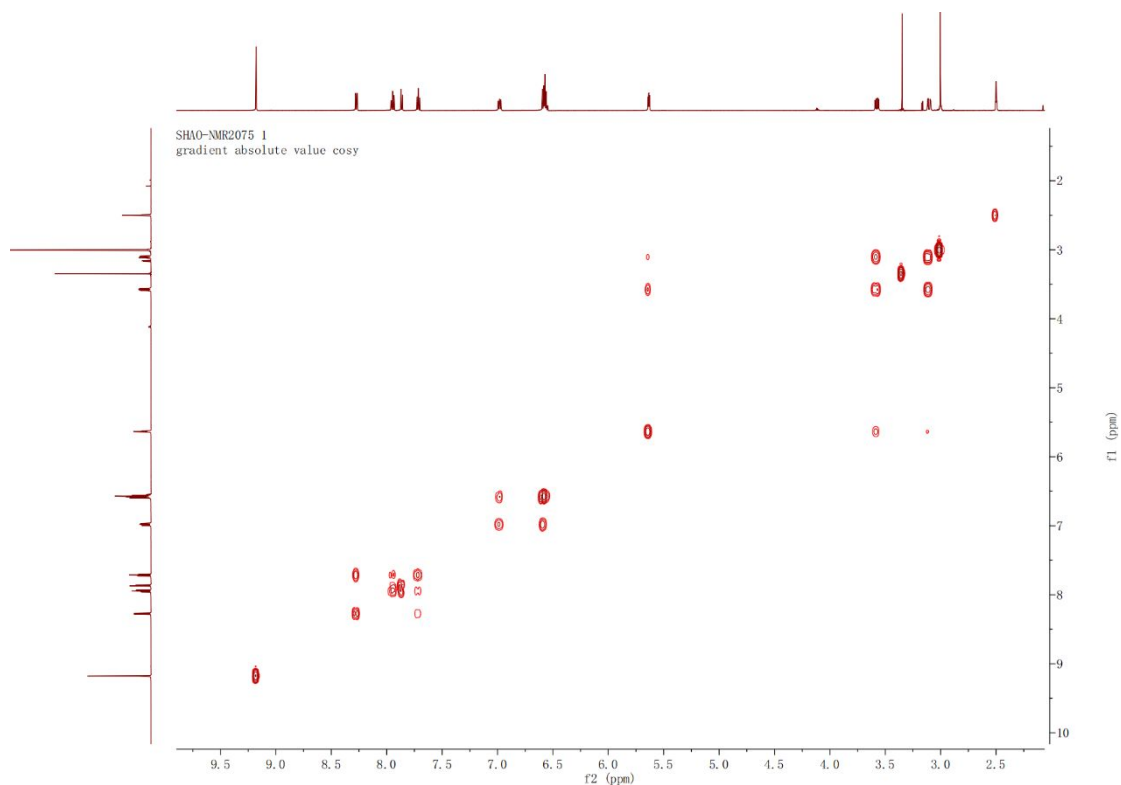

**Figure S13.** COSY spectrum of compound **2** in DMSO- $d_6$

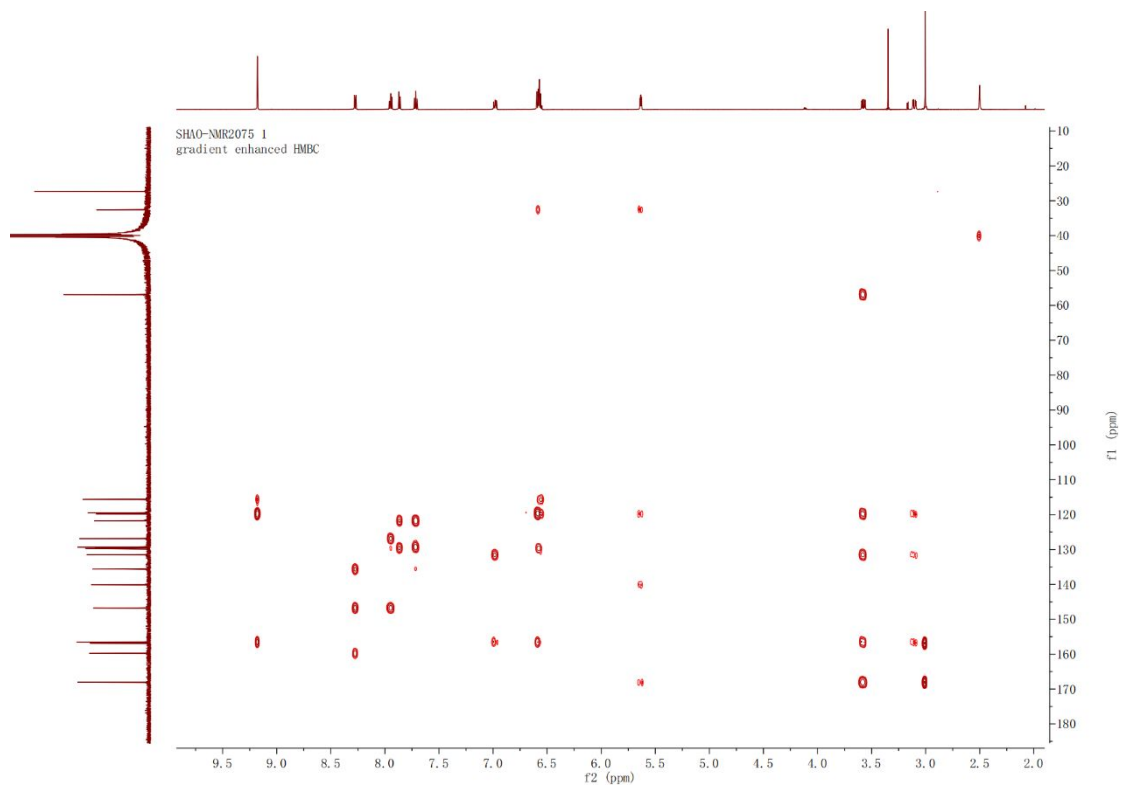

**Figure S14.** HMBC spectrum of compound **2** in DMSO-*d*<sub>6</sub>

CHNQD-2075 #17 RT: 0.20 AV: 1 NL: 6.42E8  
T: FTMS + p ESI Full ms [100.0000-1500.0000]

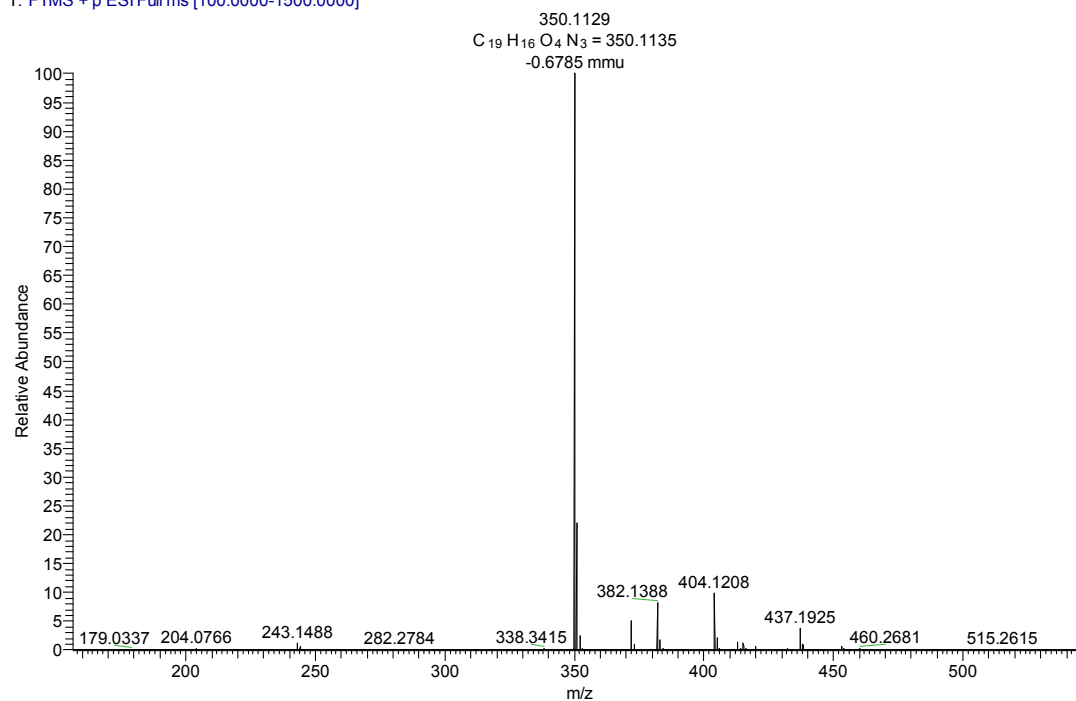

**Figure S15.** HRESIMS (ESI<sup>+</sup>) of compound **2**
